# Supplementary material for: Can terminators be used as insulators into yeast synthetic gene circuits?
Source: PubMed Central journal article supplement (PMC5162094; doi:10.1186/s13036-016-0040-5), 2016-12-16
Supplement: 13036_2016_40_MOESM1_ESM.pdf [file 13036_2016_40_MOESM1_ESM.pdf]

Can terminators be used as insulators into yeast synthetic  
gene circuits?

## Supplementary Material

Wenjiang Song<sup>1</sup>, Jing Li<sup>1</sup>, Qiang Liang<sup>1</sup>, and Mario Andrea Marchisio<sup>1,\*</sup>

<sup>1</sup>School of Life Science and Technology, Harbin Institute of Technology,

2 Yikuang Street, Nan Gang District, 150080 Harbin, P. R. China

\*corresponding author

email addresses: WS, 1176784021@qq.com; JL, 920138462@qq.com; QL, 804257847@qq.com;

MAM: marchisio@hit.edu.cn, mamarchisio@yahoo.com

## Results and Discussion

### Building new synthetic promoters by using terminator sequences

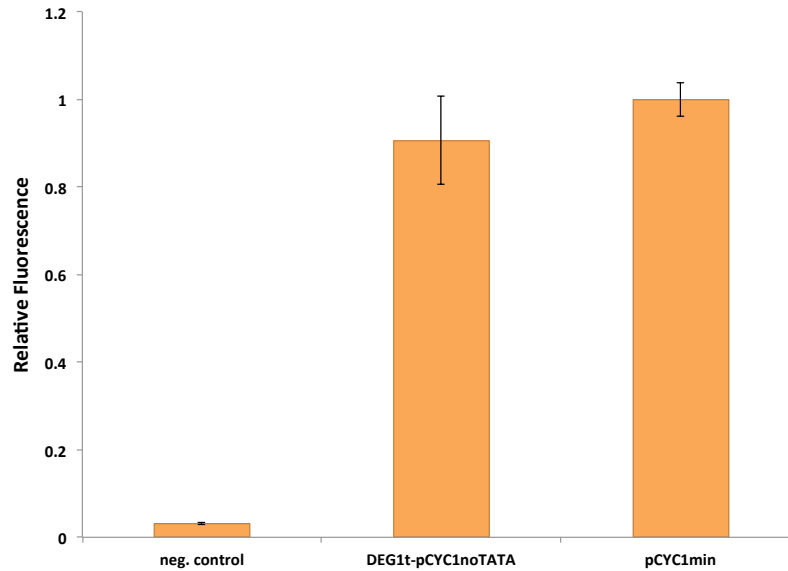

Figure S1: Comparison between the synthetic DEG1t-pCYC1noTATA and the minimal CYC1 promoter. Fluorescence levels are normalized with respect to the one of pCYC1min. DEG1t-pCYC1noTATA and pCYC1min seem to have the same strength since no statistically significant difference between their fluorescence levels was detected (two-sided Welch's t-test, p-value = 0.94). Compared to pCYC1min, DEG1t-pCYC1noTATA has a stronger TATA box at a slightly longer distance (7 more nucleotides) from the TSS.

## Insulating the strong GPD promoter

Table S1: Distance between the terminator TATA-box motifs and the pGPD strong bipartite UAS (nt stands for nucleotides).

| Promoter        | TATA box | Kind   | Distance from pGPD UAS (nt) |
|-----------------|----------|--------|-----------------------------|
| DEG1t-pGPD      | TATAAA   | Strong | 205                         |
| Tsynth8-pGPD    | TATAAA   | Strong | 209                         |
| genCYC1t-pGPD   | TATTTA   | Weak   | 264                         |
|                 | TATTAA   | Weak   | 236                         |
|                 | TATTTA   | Weak   | 224                         |
| shortADH1t-pGPD | TATAAAA  | Strong | 312                         |
|                 | TTTAAA   | Weak   | 287                         |
|                 | TTTAAA   | Weak   | 268                         |

## Modeling

As we have shown in the main text, the insulation of GPD promoter with the DEG1 terminator provokes a remarkable decrease in gene expression. In our view, this is due to the fact that DEG1t yeast *S. cerevisiae* terminator contains a strong efficiency element that resembles and works as a strong TATA box i.e. it recruits RNA polymerase II molecules. This was proved with the insulation of the promoter we termed pCYC1noTATA. RNA polymerase II molecules, by binding the insulator efficiency element, interfere with promoter transcriptional activity. There are two possibilities: 1) the DEG1t efficiency element and the pGPD TATA box bind RNA polymerase II independently i.e. DEG1t efficiency element contributes only to a reduction in the number of RNA polymerase II molecules available in the nucleus (*independent binding*); 2) the efficiency element, by binding RNA polymerase II, sequesters the promoter and prevents other RNA polymerase II molecules from binding the TATA box (*promoter sequestration*). It should be noted that the binding of the activator GRF1 to the pGPD UAS is not taken, here, explicitly into account. However, its contribution to the transcription process, namely the recruitment of RNA polymerase II molecules to the pGPD TATA-box, is present in the model. Our analysis aims only at showing which one of the two possibilities described above can represent properly our experimental results i.e. the reduction in fluorescence expression due to pGPD insulation by DEG1t. To this aim, we do not need a complete mechanistic description of transcription initiation that takes into account all the factors that help RNA polymerase II bind the DNA and other mechanisms such as DNA bending.

### Independent binding

Independent binding of RNA polymerase II to DEG1t terminator efficiency element and pGPD TATA box can be modeled as

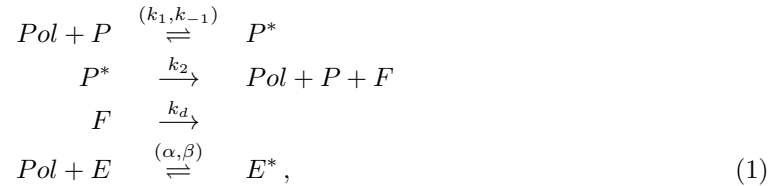

where  $Pol$  represents RNA polymerase II molecules available in the nucleus,  $P$  is the promoter in its inactive configuration (RNA polymerase II is not bound to the TATA-box),  $P^*$  is the active promoter (RNA polymerase is bound to the TATA box),  $F$  is the fluorescence protein,  $E$  represents the terminator efficiency element free of any RNA polymerase II molecules, and  $E^*$  is the terminator efficiency element bound to RNA polymerase II. Rate -constant symbols and units are explained in Table S2. As stated above, the role of the efficiency element in Eqs (1) is to lower the number of RNA polymerase II molecules that can contribute to fluorescence expression. For the sake of simplicity, in Eqs (1) translation is treated as a single step event and cell compartmentalization is neglected.

| Rate constant | Reaction                                 | Units          |
|---------------|------------------------------------------|----------------|
| $k_1$         | RNA polymerase II-promoter association   | $M^{-1}s^{-1}$ |
| $k_{-1}$      | RNA polymerase II-promoter dissociation  | $s^{-1}$       |
| $k_2$         | transcription initiation                 | $s^{-1}$       |
| $k_d$         | GFP decay                                | $s^{-1}$       |
| $\alpha$      | RNA polymerase II-insulator association  | $M^{-1}s^{-1}$ |
| $\beta$       | RNA polymerase II-insulator dissociation | $s^{-1}$       |

Table S2: Rate constants used in Eqs (1).

We assume that the cell volume corresponds to the yeast nuclear volume ( $V = 2.9 \cdot 10^{-15} l$  [1]). We integrated a single copy of each construct into the yeast genome. Hence, we shall require

that  $P_T = P + P^* = 1$  i.e. the total number of promoter molecules ( $P_T$ ) is equal to 1. Since the green fluorescence protein (GFP) is very stable, we can take as a reasonable approximation for its half-life the doubling time of yeast cells in a synthetic medium, i.e. 140 minutes [2]. This corresponds to  $k_d = 8.25 \cdot 10^{-5} \text{ s}^{-1}$ . In the lab, we did not measure GFP concentration but only fluorescence levels. To our knowledge, there is not precise way to convert a fluorescence level (which is strongly affected by the machine type and setup) to a protein number. Since pGPD is a strong promoter, we think that it is reasonable to consider that, at steady state, at least 100 molecules of fluorescent proteins are present in the cell [3]. In the following analysis we will use two possible GFP steady-state amounts: 100 (A) and 1000 (B) molecules. We will see that the qualitative result of our model (i.e. whether independent binding or promoter sequestration takes place) is independent of GFP concentration at steady state (provided that is as high as we assume). Values for  $k_1$ ,  $k_{-1}$ ,  $k_2$ , and  $Pol_T$  (i.e. the total number of RNA polymerase II molecules available in the cell to bind either  $P$  or  $E$ ) are found by running an optimization procedure on the first three reactions in Eqs (1). They represent a model for the dynamics of GFP produced by the constitutive GPD promoter. We run the Simulated Annealing (SA) algorithm implemented in COPASI [4] (see TableS5 for our setting of calculation parameters) and set the lower and upper bound of each kinetic parameter according to the values in [1] (see Table S3). For each of the two chosen GFP steady states (100 and 1000 molecules), we repeated the optimization procedure three times (I, II, III) by varying each time the upper and lower bound on  $Pol_T$  (see Table S4 [1]). The objective function was set either to  $(F_{ss} - 100)^2 = 0$  (case A) or  $(F_{ss} - 1000)^2 = 0$  (case B), where  $F_{ss}$  is the number of GFP particles at steady state.

| Rate constant | Lower bound | Upper bound | Units          |
|---------------|-------------|-------------|----------------|
| $k_1$         | $10^4$      | $10^7$      | $M^{-1}s^{-1}$ |
| $k_{-1}$      | $10^{-3}$   | 10          | $s^{-1}$       |
| $k_2$         | 0.1         | 2           | $s^{-1}$       |
| $\alpha$      | $10^4$      | $10^9$      | $M^{-1}s^{-1}$ |
| $\beta$       | $10^{-4}$   | 10          | $s^{-1}$       |

Table S3: Upper and lower bound on the kinetic parameter values used in our models.

| Label | Lower bound | Upper bound |
|-------|-------------|-------------|
| I     | 80          | 100         |
| II    | 1600        | 2000        |
| III   | 4000        | 5000        |

Table S4: Our choices of  $Pol_T$  upper and lower bound.

| Parameter               | Value     |
|-------------------------|-----------|
| Starting Temperature    | 1         |
| Cooling Factor          | 0.85      |
| Tolerance               | $10^{-6}$ |
| Random Number Generator | 1         |
| Seed                    | 0         |

Table S5: Simulated Annealing parameter setting.

After finding, on the whole, six possible sets of parameters values for  $k_1$ ,  $k_{-1}$ ,  $k_2$ , and  $Pol_T$  (see Table S6), we considered the complete model in Eqs (1) and looked for values of  $\alpha$  and  $\beta$  that could reproduce the wet-lab result of the DEG1t-pPGPD system i.e. a fluorescence level equal to the 77% of the non-insulated one. To this aim, we made use of Simulated Annealing again. Upper and lower bounds for both  $\alpha$  and  $\beta$ , reported in Table S3, are similar to the one for  $k_1$  and  $k_{-1}$ , respectively. However, we set a higher upper bound on  $\alpha$  and a smaller lower bound on

| Parameter set | $F_{ss}$ | $k_1$             | $k_{-1}$ | $k_2$ | $Pol_T$ |
|---------------|----------|-------------------|----------|-------|---------|
| A.I           | 100      | $1.56 \cdot 10^5$ | 0.026    | 1.71  | 93.99   |
| A.II          | 100      | $1.21 \cdot 10^4$ | 0.084    | 0.19  | 1787.29 |
| A.III         | 100      | $1.22 \cdot 10^4$ | 0.994    | 0.41  | 4116.89 |
| B.I           | 1000     | $1.52 \cdot 10^6$ | 0.007    | 1.73  | 99.80   |
| B.II          | 1000     | $7.86 \cdot 10^4$ | 0.031    | 1.37  | 1994.56 |
| B.III         | 1000     | $3.78 \cdot 10^4$ | 0.027    | 1.96  | 4037.8  |

Table S6: Parameter values—obtained via Simulated Annealing—for GFP constitutive expression under GPD promoter (first three reactions in Eqs (1)).

$\beta$  to allow a stronger binding between RNA polymerase II and the efficiency element. On each of our six parameter sets SA failed to find values for  $\alpha$  and  $\beta$  such that the objective function was satisfied (see Table S7). Therefore, we had to conclude that the *independent binding* model could not explain our experimental data.

| Parameter set | $\alpha$          | $\beta$ | $F_{ss}$ | Target $F_{ss}$ |
|---------------|-------------------|---------|----------|-----------------|
| A.I           | $1.00 \cdot 10^9$ | 0.0001  | 99.11    | 77              |
| A.II          | $9.97 \cdot 10^8$ | 0.0001  | 99.97    | 77              |
| A.III         | $9.97 \cdot 10^8$ | 0.0001  | 99.97    | 77              |
| B.I           | $1.00 \cdot 10^9$ | 0.0001  | 989.87   | 770             |
| B.II          | $1.00 \cdot 10^9$ | 0.0001  | 999.53   | 770             |
| B.III         | $9.99 \cdot 10^8$ | 0.0001  | 999.76   | 770             |

Table S7: Values for  $\alpha$  and  $\beta$  in Eqs (1) computed by SA and the corresponding GFP particle number at steady state ( $F_{ss}$ —calculated by COPASI by solving the ODE system in Eqs(3)). "Target  $F_{ss}$ " is the result the model should achieve after the optimization procedure. However, every model returns an  $F_{ss}$  that is about 1.3 folds higher than the target one.

## Promoter sequestration

In the promoter sequestration model, RNA polymerase II, by binding the efficiency element, prevents other RNA polymerase II molecules from binding the TATA box and start  $F$  synthesis. Reactions and species become

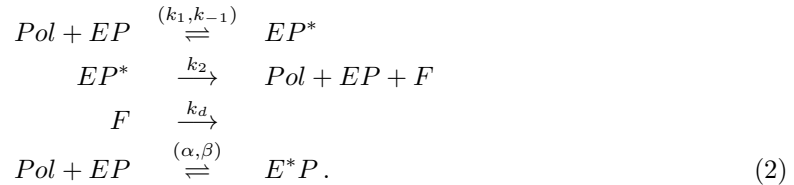

According to Eqs (2), efficiency element ( $E$ ) and TATA box ( $P$ ) belong to a unique species ( $EP$ ) where RNA polymerase II can bind either site:  $EP^*$  is the active promoter configuration, i.e. RNA polymerase II has bound the TATA box and can proceed with gene expression, whereas  $E^*P$  is the sequestered promoter, where RNA polymerase II has bound the insulator and prevents promoter activation. As we did in the previous model, we run SA on the six sets of values for  $k_1$ ,  $k_{-1}$ ,  $k_2$ , and  $Pol_T$  in Table S6 looking for values of  $\alpha$  and  $\beta$  that could reproduce our wet-lab data. Upper and lower bound for  $\alpha$  and  $\beta$  are the same as in Table S3. In the promoter sequestration framework, SA was always able to find values for  $\alpha$  and  $\beta$  such that  $F_{ss}$  was equal to either 77 or 770 molecules (see Table S8).

On the whole, although the models in Eqs (1,2) are based on a very simplified picture of transcription initiation and protein synthesis, they point out clearly that, in order to explain our experimental results, we have to assume that a terminator, when used as an insulator, prevents

| Parameter set | $\alpha$          | $\beta$ | $F_{ss}$ | Target $F_{ss}$ |
|---------------|-------------------|---------|----------|-----------------|
| A.I           | $8.83 \cdot 10^5$ | 0.159   | 77       | 77              |
| A.II          | $2.92 \cdot 10^4$ | 0.096   | 77       | 77              |
| A.III         | $3.00 \cdot 10^4$ | 0.232   | 77       | 77              |
| B.I           | $1.46 \cdot 10^5$ | 0.027   | 770      | 770             |
| B.II          | $2.21 \cdot 10^5$ | 0.794   | 770      | 770             |
| B.III         | $1.06 \cdot 10^5$ | 0.788   | 770      | 770             |

Table S8: The values of  $\alpha$  and  $\beta$ –in Eqs (2)–computed by SA satisfy the request that  $F_{ss}$  (a solution of the ODE system in Eqs(4) is equal to "Target  $F_{ss}$ ".

a full promoter activation. RNA polymerase II, by binding the insulator efficiency element, sequesters the promoter and limits the binding of other RNA polymerase II molecules to the TATA box. This result does not require a precise knowledge of the amount of RNA polymerase II in the cell and the number of green fluorescent proteins at steady state. The parameters involved in our models have been tuned to reproduce the case of the insulation of the strong GPD promoter by means of the DEG1t terminator. However, this theoretical representation can be applied to different insulated promoters too.

## ODE systems

The name of each species in the following ODE systems indicates species concentration.

### Independent binding

$$\begin{aligned}
\frac{dPol}{dt} &= -k_1 Pol P + (k_{-1} + k_2)P^* - \alpha Pol E + \beta E^* \\
\frac{dP}{dt} &= -k_1 Pol P + (k_{-1} + k_2)P^* \\
\frac{dP^*}{dt} &= k_1 Pol P - (k_{-1} + k_2)P^* \\
\frac{dF}{dt} &= k_2 P^* - k_d F \\
\frac{dE}{dt} &= -\alpha Pol E + \beta E^* \\
\frac{dE^*}{dt} &= \alpha Pol E - \beta E^*
\end{aligned} \tag{3}$$

### Promoter sequestration

$$\begin{aligned}
\frac{dPol}{dt} &= -k_1 Pol EP + (k_{-1} + k_2)EP^* - \alpha Pol EP + \beta E^* P \\
\frac{dEP}{dt} &= -k_1 Pol EP + (k_{-1} + k_2)EP^* \\
\frac{dEP^*}{dt} &= k_1 Pol EP - (k_{-1} + k_2)EP^* \\
\frac{dF}{dt} &= k_2 EP^* - k_d F \\
\frac{dEP}{dt} &= -\alpha Pol EP + \beta E^* P \\
\frac{dE^* P}{dt} &= \alpha Pol EP - \beta E^* P
\end{aligned} \tag{4}$$

## Insulating different promoters

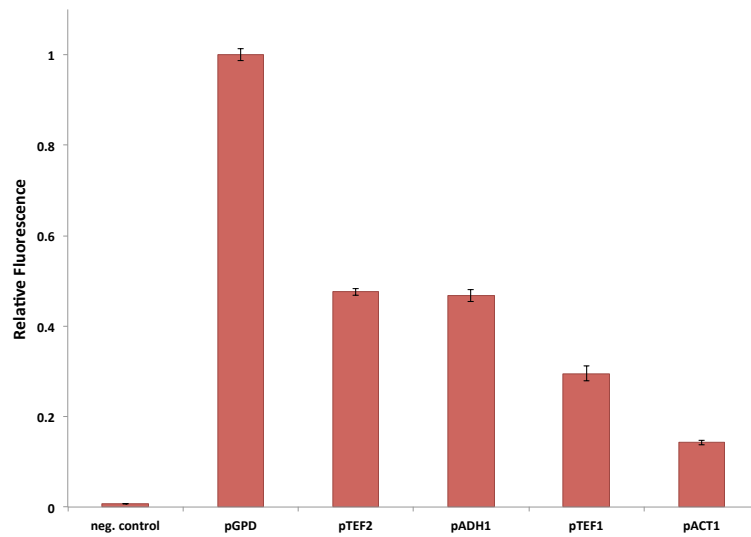

Figure S2: Yeast constitutive promoter strength. Comparison of the fluorescence level associated with the five yeast constitutive promoters used in this work. All fluorescence levels are normalized with respect to the pGPD one.



## Placing an insulator between two transcription units

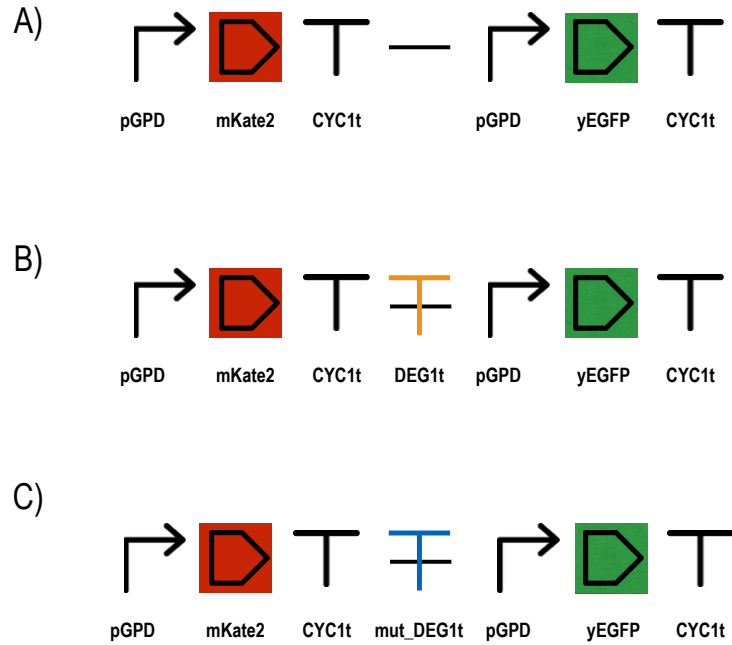

Figure S3: Two-transcription-unit systems. Two adjacent transcription units are assembled inside a vector. Both contain pGPD and CYC1t. The upstream transcription unit expresses red fluorescent protein, whereas the downstream transcription unit expresses the green one. A) No insulator is placed between the two transcription units. B) DEG1t lies between the two transcription units. C) mut\_DEG1t replaces DEG1ts between the two transcription units.

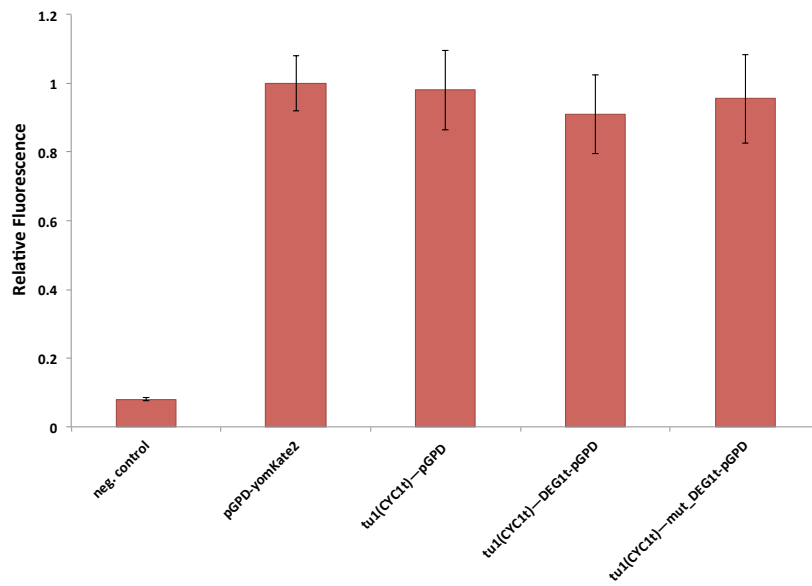

Figure S4: Red fluorescent protein expression by two-transcription-unit systems. *yomKate2* expression seems not to resent of the presence of a downstream transcription unit, not matter if insulated or not. Each two-transcription-unit construct is labeled as *tu1(CYC1)* (i.e. the upstream transcription unit that encodes for *yomKate2* and ends with *CYC1t*) and the name of the promoter of the downstream transcription unit. The positive control is the strain that produces *yomKate2* only (pGPD-*yomKate2*). Fluorescence levels are normalized with respect to the one expressed by pGPD in a single transcription unit.

## Methods

### Assembly techniques: GFP expression and difference in plasmid sequences

As shown in Table S9, most of our plasmids were constructed with the isothermal assembly technique (ITA) and few of them with the MoClo method. The 1-level acceptor vector ypL1F-1.406 was built on pRSII406 as explained in the main text. Moreover, a BsaI site was removed from the ampicillin resistance sequence and another BsaI site together with a BpiI site were removed from the URA3 marker sequence. In the plasmids assembled with the MoClo method, a transcription unit is flanked by two BpiI sites, whereas in the plasmids assembled through the isothermal assembly technique transcription units are placed between KpnI and SacI sites. Each transcription unit assembled with the MoClo method has four more bases (GCTT) between yEGFP and CYC1t. Finally, the plasmids assembled with the MoClo method contains yEGFPgg where a BsaI site was removed via a silent mutation. In order to check if these differences had an effect on GFP expression, we assembled a transcription unit carrying DEG1t-pCYC1noTATA both into pMM146 (ITA and yEGFP) and pMM195 (MoClo and yEGPgg). These two plasmids were integrated into the yeast strain byMM2 giving raise to byMM67 and byMM88, respectively. Their fluorescence levels, shown in Figure S5, do not have any statistically significant difference. Therefore, our results are independent of the plasmid assembly techniques.

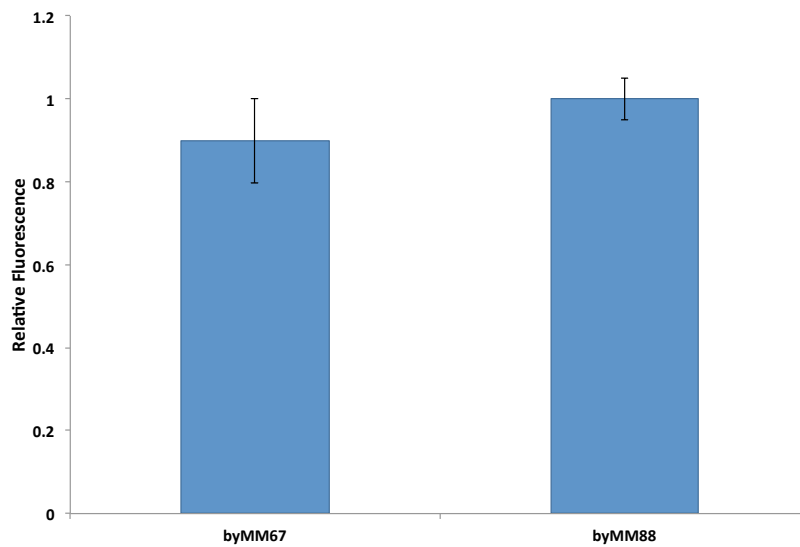

Figure S5: Comparison of fluorescence levels from plasmids assembled with different techniques. The transcription unit into pMM195 (byMM88) differs from the one into pMM146 (byMM67) for a point mutation along the yEGFP sequence and four more bases before CYC1t. Few more differences in the two plasmids are due to the adaptation of pRSII406 to the MoClo procedure. All these modifications do not have any particular influence on protein expression since we did not find any statistically significant difference between the fluorescence levels of the two strains (two-sided Welch's t-test, p-value = 0.28). Fluorescence levels are normalized with respect to byMM88 one.

## Plasmids used in this work

| Plasmid name | Construct                                                    | Assembly method |
|--------------|--------------------------------------------------------------|-----------------|
| pMM53        | pRSII406-pGPD-yEGFP-CYC1t                                    | ITA             |
| pMM54        | pRSII406-DEG1t-pGDP-yEGFP-CYC1t                              | ITA             |
| pMM61        | pRSII406-pCYC1min-yEGFP-CYC1t                                | ITA             |
| pMM72        | pRSII406-genCYC1t-pGPD-yEGFP-CYC1t                           | ITA             |
| pMM73        | pRSII406-Tsynth8-pGPD-yEGFP-CYC1t                            | ITA             |
| pMM81        | pRSII406-shortADH1t-pGPD-yEGFP-CYC1t                         | ITA             |
| pMM90        | pRSII406-pTEF1-yEGFP-CYC1t                                   | ITA             |
| pMM109       | pRSII406-pCYC1noTATA-yEGFP-CYC1t                             | ITA             |
| pMM123       | pRSII406-pACT1-yEGFP-CYC1t                                   | ITA             |
| pMM124       | pRSII405-pGPD-yomKate2-CYC1t                                 | ITA             |
| pMM131       | pRSII406-pTEF2-yEGFP-CYC1t                                   | ITA             |
| pMM132       | pRSII406-Tsynth8-pCYC1noTATA-yEGFP-CYC1t                     | ITA             |
| pMM137       | ypL1F-1_406 (yeast 1-level acceptor; URA3)                   | ITA             |
| pMM144       | pRSII406-shortADH1t-pCYC1noTATA-yEGFP-CYC1t                  | ITA             |
| pMM146       | pRSII406-DEG1t-pCYC1noTATA-yEGFP-CYC1t                       | ITA             |
| pMM188       | ypL1F-1_406-genCYC1t-pCYC1noTATA-yEGFPgg-CYC1t               | MoClo           |
| pMM194       | ypL1F-1_406-Tsynth8-s100-pCYC1noTATA-yEGFPgg-CYC1t           | MoClo           |
| pMM195       | ypL1F-1_406-DEG1t-pCYC1noTATA-yEGFPgg-CYC1t                  | MoClo           |
| pMM284       | pRSII406-mut_Tsynth8-pCYC1noTATA-yEGFP-CYC1t                 | ITA             |
| pMM285       | pRSII406-mut_DEG1t-pCYC1noTATA-yEGFP-CYC1t                   | ITA             |
| pMM292       | pRSII406-mut_pGPD-yEGFPgg-CYC1t                              | ITA             |
| pMM294       | pRSII406-mut_DEG1t-PGPD-yEGFP-CYC1t                          | ITA             |
| pMM326       | ypL1F-1_406-pGPD-yomKate2-CYC1t-pGPD-yEGFPgg-CYC1t           | MoClo           |
| pMM340       | ypL1F-1_406-pGPD-yomKate2-CYC1t-DEG1t-pGPD-yEGFPgg-CYC1t     | MoClo           |
| pMM342       | pRSII406-DEG1t-mut_PGPD-yEGFPgg-CYC1t                        | ITA             |
| pMM343       | pRSII406-mut_DEG1t-mut_PGPD-yEGFPgg-CYC1t                    | ITA             |
| pMM344       | ypL1F-1_406-pGPD-yomKate2-CYC1t-mut_DEG1t-pGPD-yEGFPgg-CYC1t | MoClo           |
| pMM345       | pRSII406-DEG1t-pTEF2-yEGFP-CYC1t                             | ITA             |
| pMM346       | pRSII406-DEG1t-pTEF1-yEGFP-CYC1t                             | ITA             |
| pMM347       | pRSII406-DEG1t-pACT1-yEGFP-CYC1t                             | ITA             |
| pMM354       | pRSII406-pADH1-yEGFPgg-CYC1t                                 | ITA             |
| pMM376       | pRSII406-DEG1t-pADH1-yEGFPgg-CYC1t                           | ITA             |

Table S9: List of the plasmids constructed in this work.

## Yeast strain used in this work

| Strain name | Genotype           |
|-------------|--------------------|
| byMM2       | FY1679-08A         |
| byMM8       | byMM2 pMM53::URA3  |
| byMM10      | byMM2 pMM54::URA3  |
| byMM15      | byMM2 pMM61::URA3  |
| byMM19      | byMM2 pMM72::URA3  |
| byMM24      | byMM2 pMM73::URA3  |
| byMM33      | byMM2 pMM81::URA3  |
| byMM38      | byMM2 pMM90::URA   |
| byMM54      | byMM2 pMM109::URA3 |
| byMM57      | byMM2 pMM123::URA3 |
| byMM60      | byMM2 pMM131::URA3 |
| byMM61      | byMM2 pMM132::URA3 |
| byMM66      | byMM2 pMM144::URA3 |
| byMM67      | byMM2 pMM146::URA3 |
| byMM88      | byMM2 pMM195::URA3 |
| byMM89      | byMM2 pMM188::URA3 |
| byMM90      | byMM2 pMM194::URA3 |
| byMM119     | byMM2 pMM124::LEU2 |
| byMM122     | byMM2 pMM284::URA3 |
| byMM123     | byMM2 pMM285::URA3 |
| byMM147     | byMM2 pMM294::URA3 |
| byMM148     | byMM2 pMM344::URA3 |
| byMM149     | byMM2 pMM292::URA3 |
| byMM150     | byMM2 pMM342::URA3 |
| byMM151     | byMM2 pMM343::URA3 |
| byMM162     | byMM2 pMM326::URA3 |
| byMM163     | byMM2 pMM340::URA3 |
| byMM179     | byMM2 pMM346::URA3 |
| byMM184     | byMM2 pMM347::URA3 |
| byMM193     | byMM2 pMM345::URA3 |
| byMM194     | byMM2 pMM354::URA3 |
| byMM196     | byMM2 pMM376::URA3 |

Table S10: List of the yeast strains constructed in this work. Plasmids are described in Table S9.

Data analysis: box plots and histograms.

A

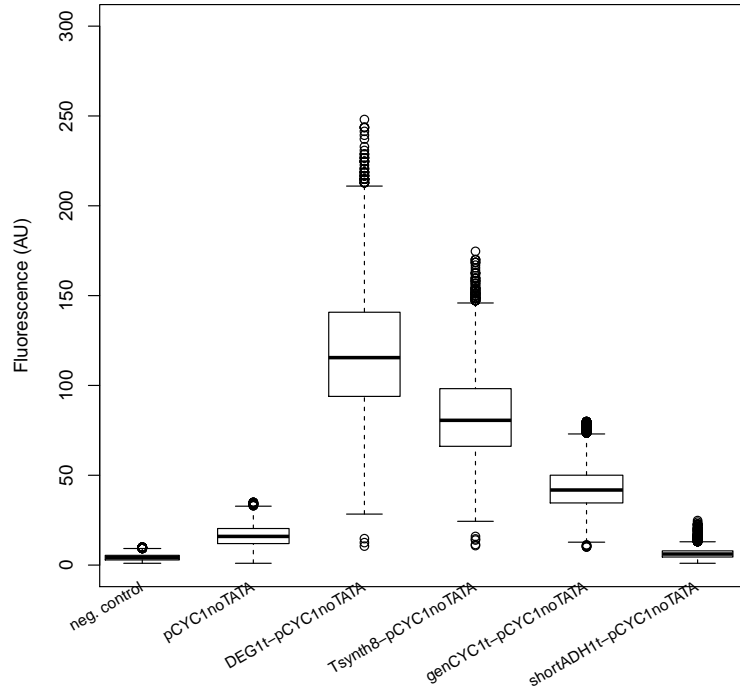

B

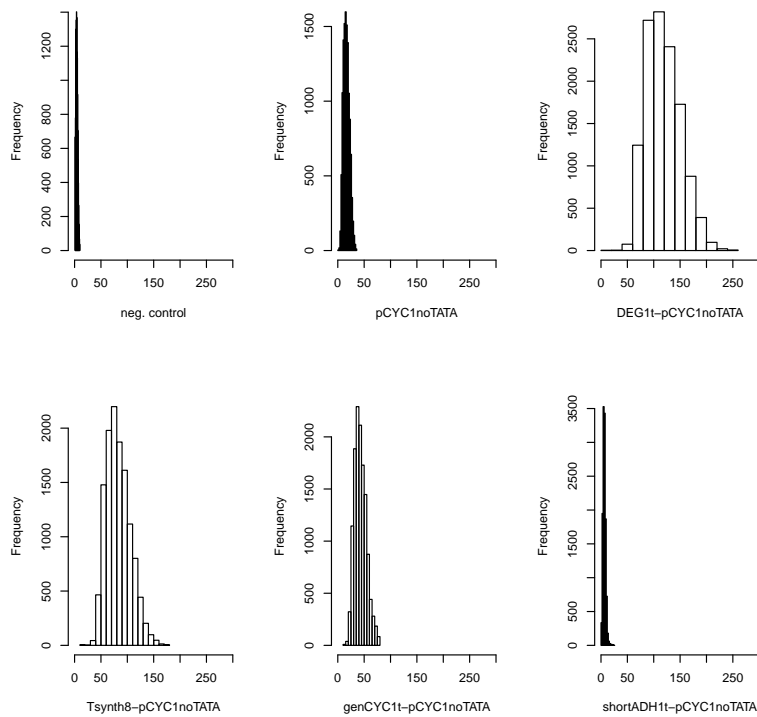

Figure S6: Fluorescence levels for the characterization of synthetic promoters made of a terminator placed in front of pCYC1noTATA (see Figure 3 in the main text). A) Box plots. B) Histograms.



A

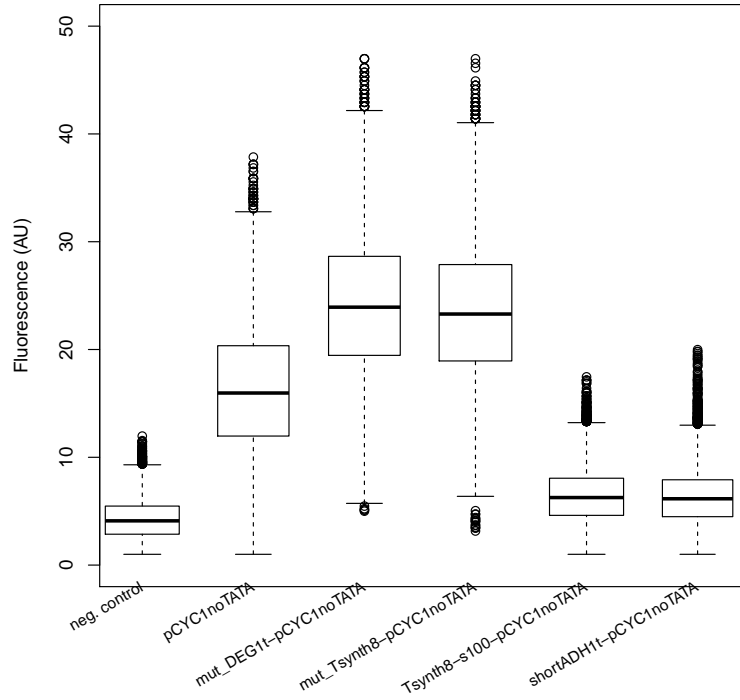

B

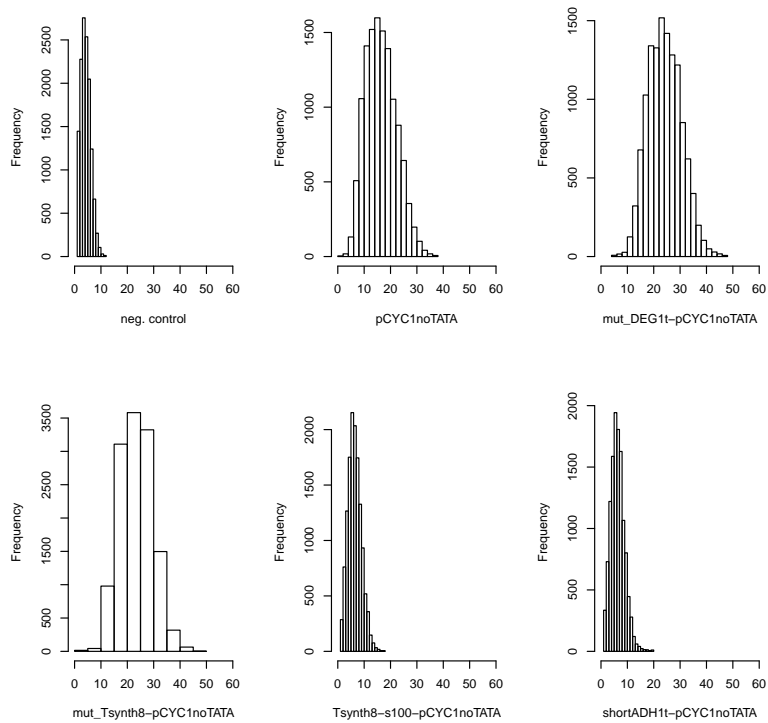

Figure S7: Mutational study on DEG1t-pCYCnoTATA and Tsynth8-pCYC1noTATA (see Figure 4 in the main text). A) Box plots. B) Histograms.

A

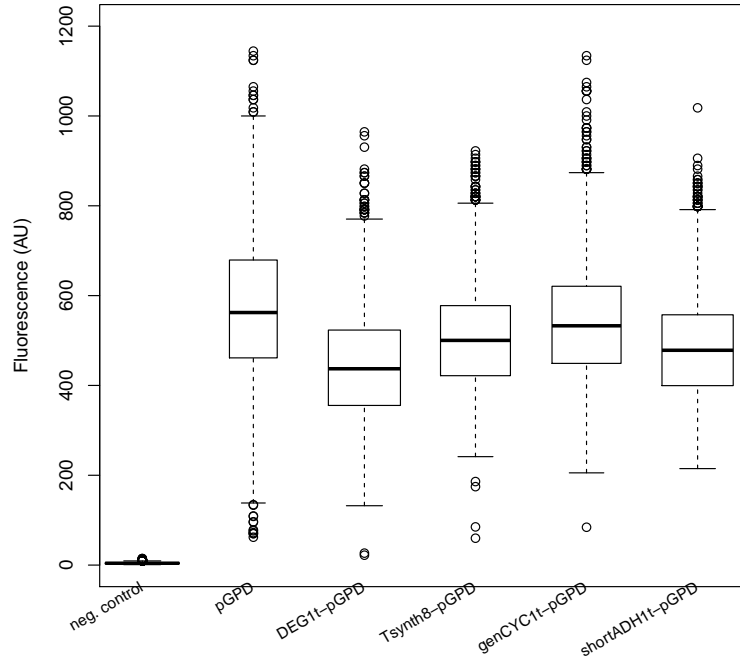

B

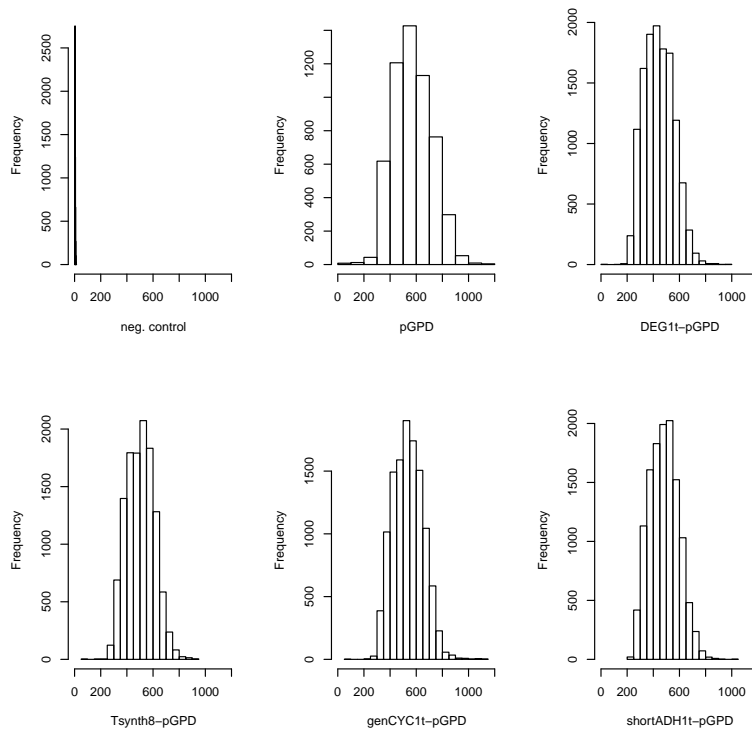

Figure S8: Fluorescence levels expressed by synthetic promoters made of different terminators preceding the strong GPD promoter (see Figure 7 in the main text). A) Box plots. B) Histograms.

A

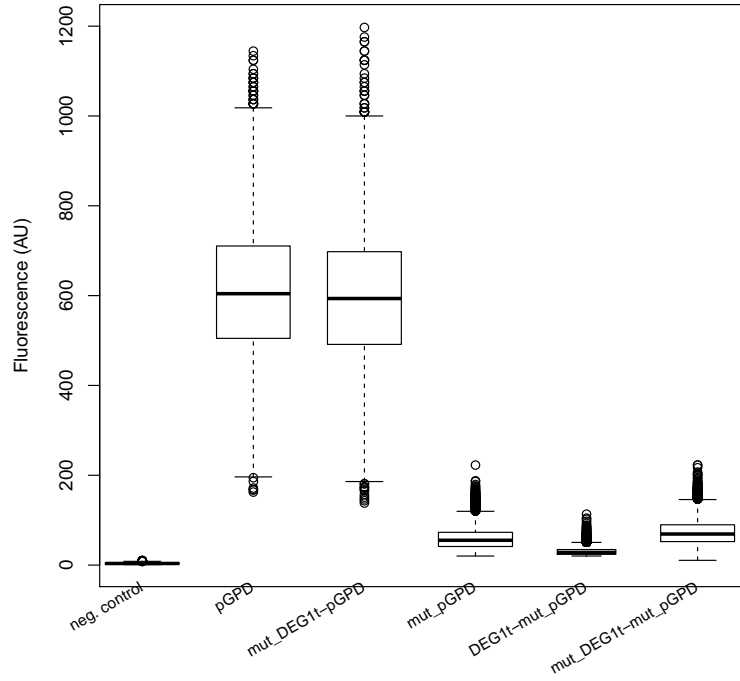

B

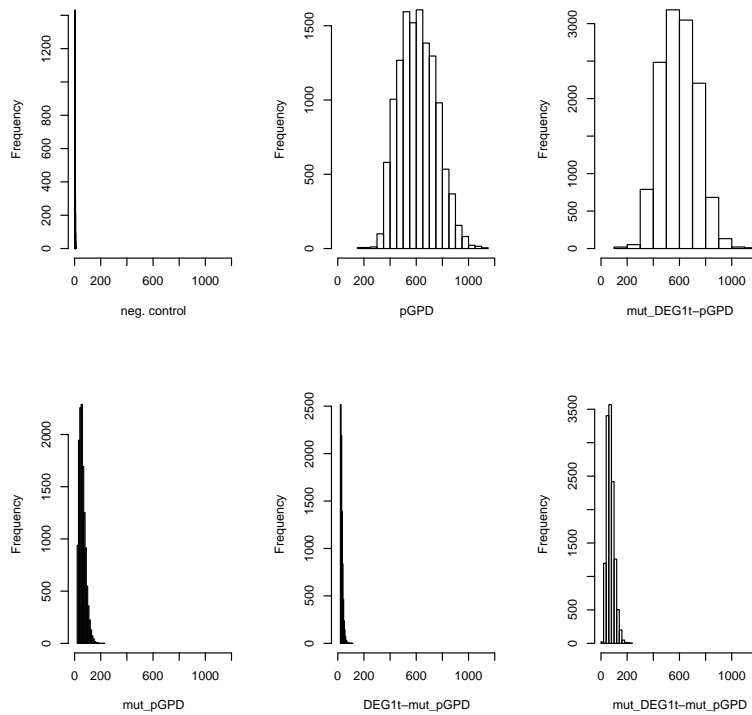

Figure S9: Mutational study on DEG1t-pGPD and DEG1t-mut\_pGPD. (see Figure 8 in the main text). A) Box plots. B) Histograms.

A

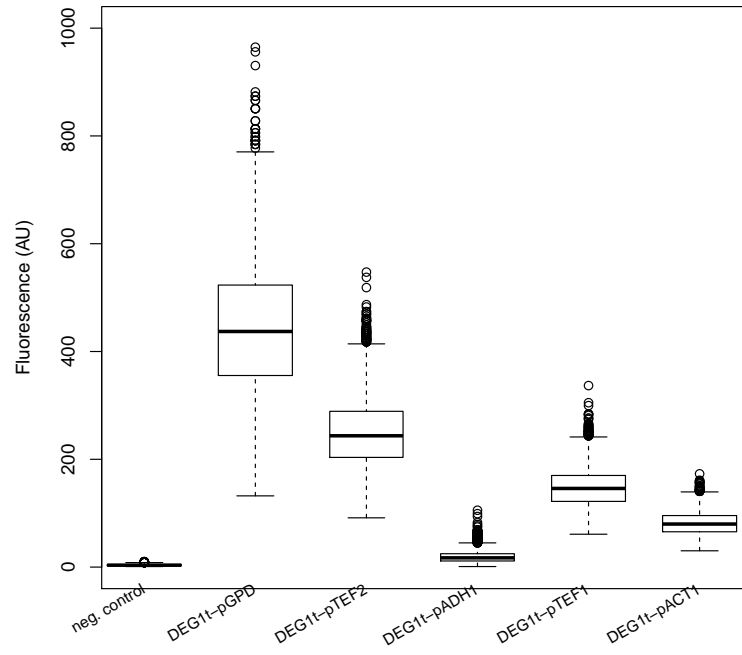

B

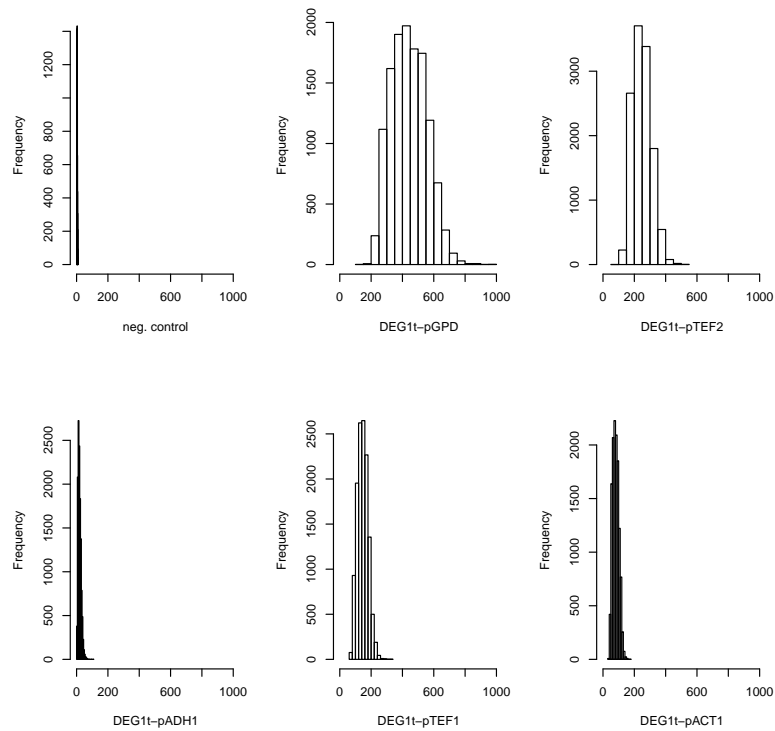

Figure S10: Effects of DEG1t as an insulator of five different yeast constitutive promoters (see Figure 9 in the main text). A) Box plots. B) Histograms.

A

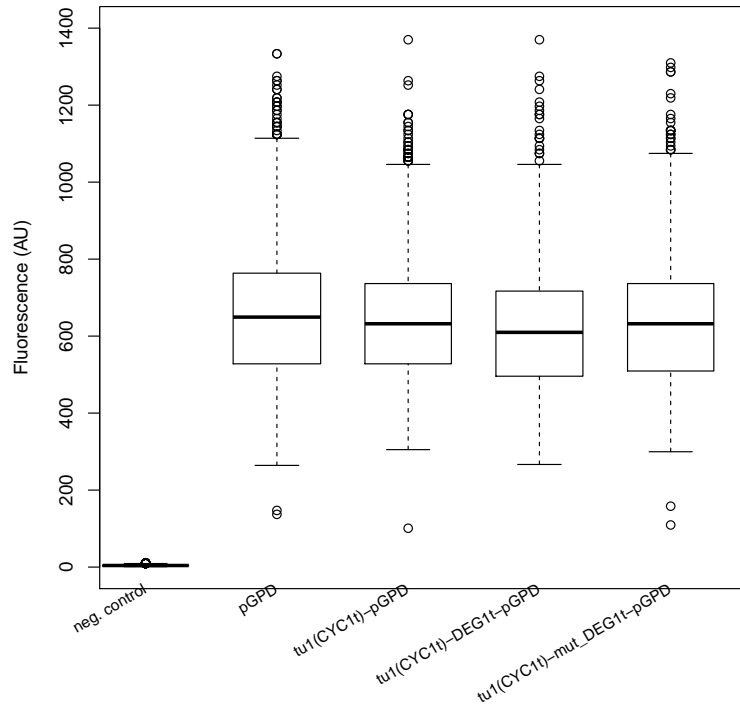

B

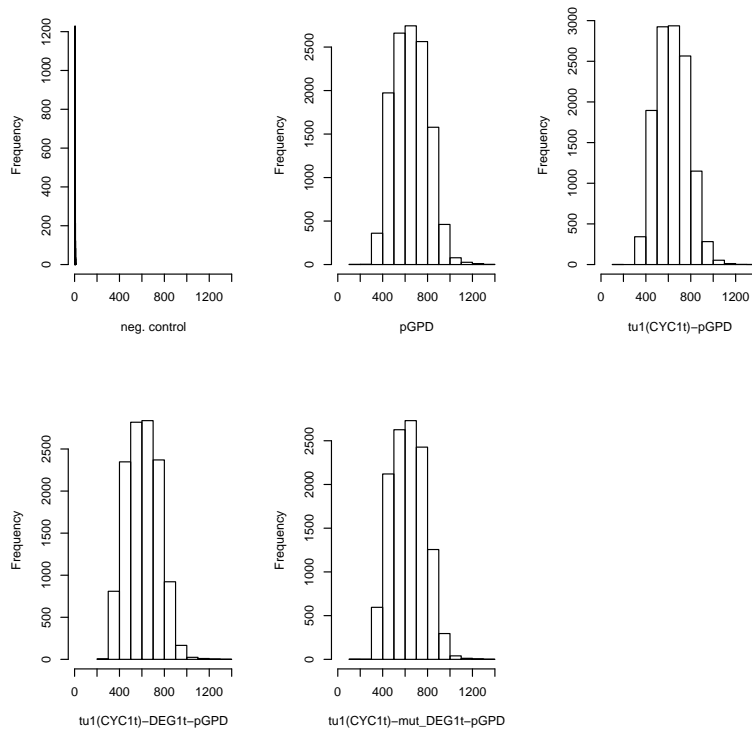

Figure S11: Expression of green fluorescence by two-transcription-unit systems (see Figure 10 in the main text). A) Box plots. B) Histograms.

A

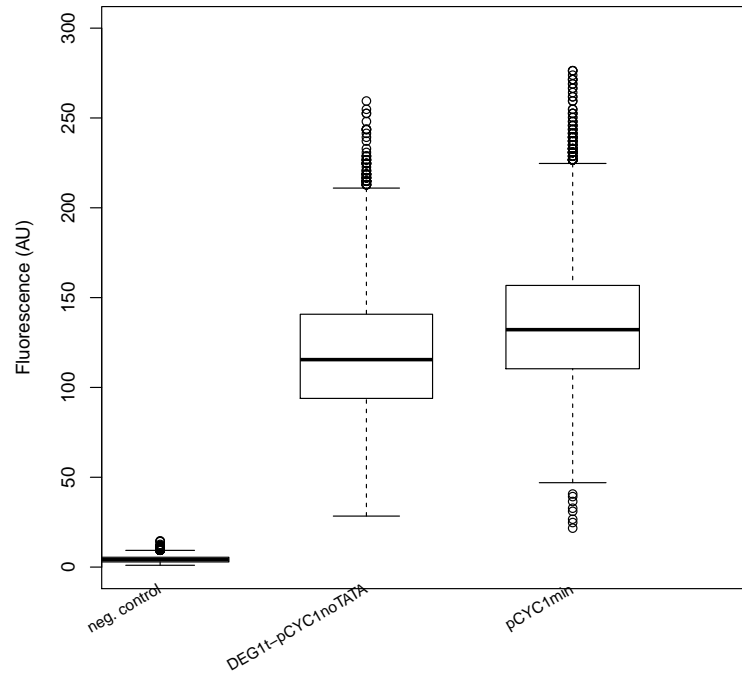

B

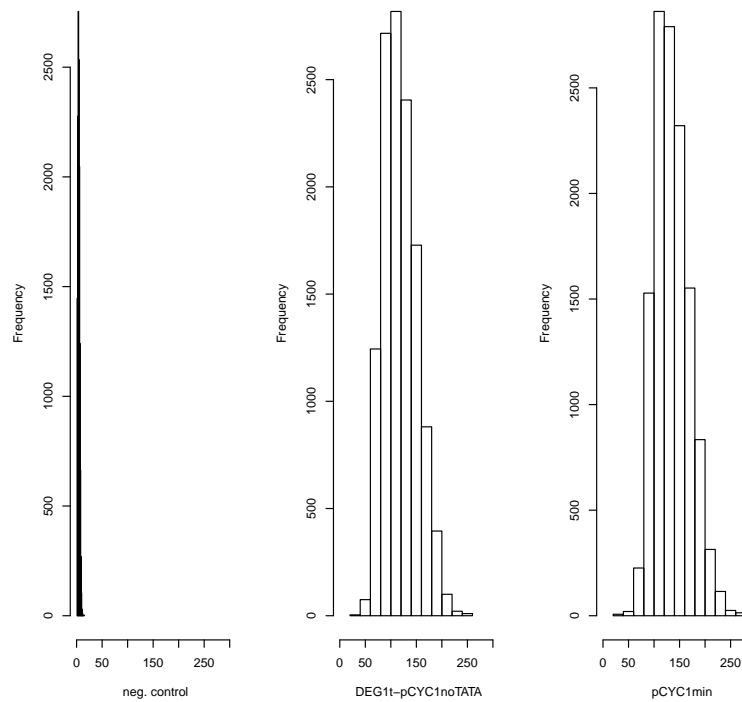

Figure S12: Comparison of the synthetic DEG1t-pCYC1noTATA with the minimal CYC1 promoter (see Figure S1 above). A) Box plots. B) Histograms.

A

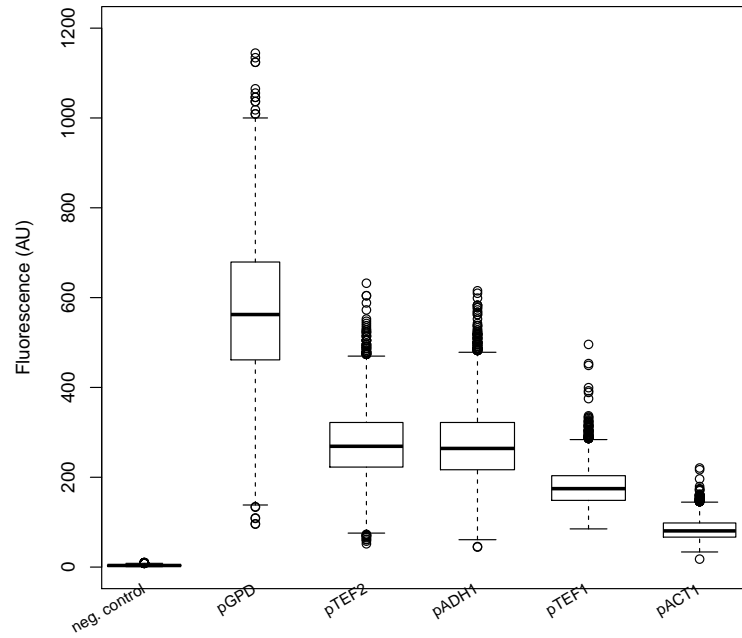

B

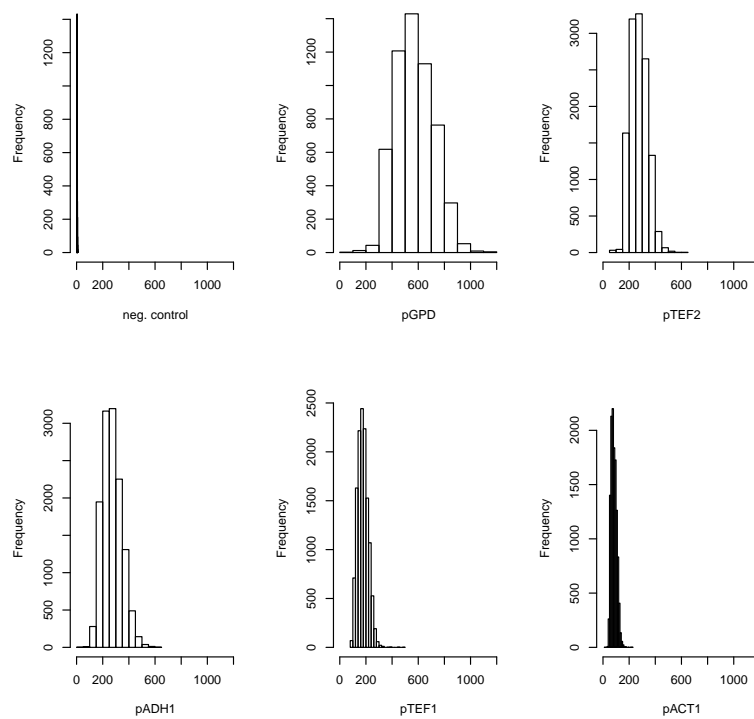

Figure S13: Yeast constitutive promoter strength (see Figure S2 above). A) Box plots. B) Histograms.

A

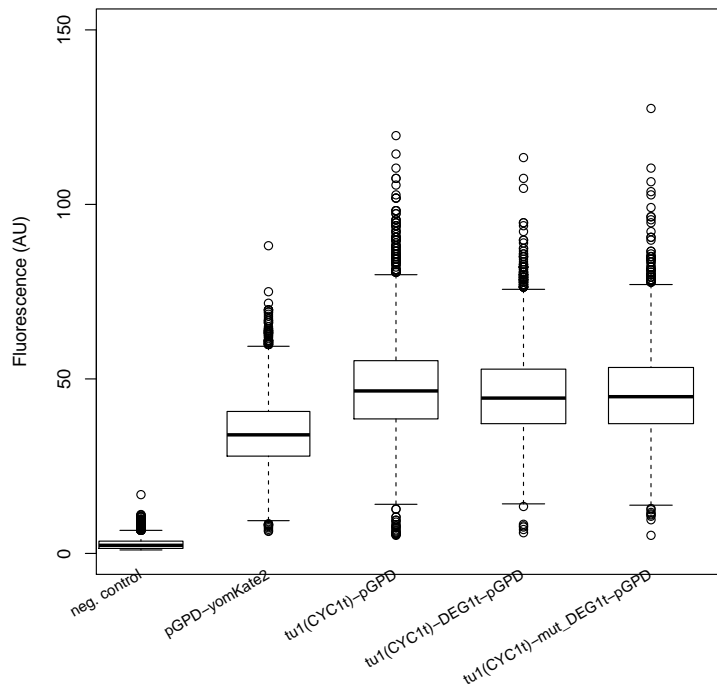

B

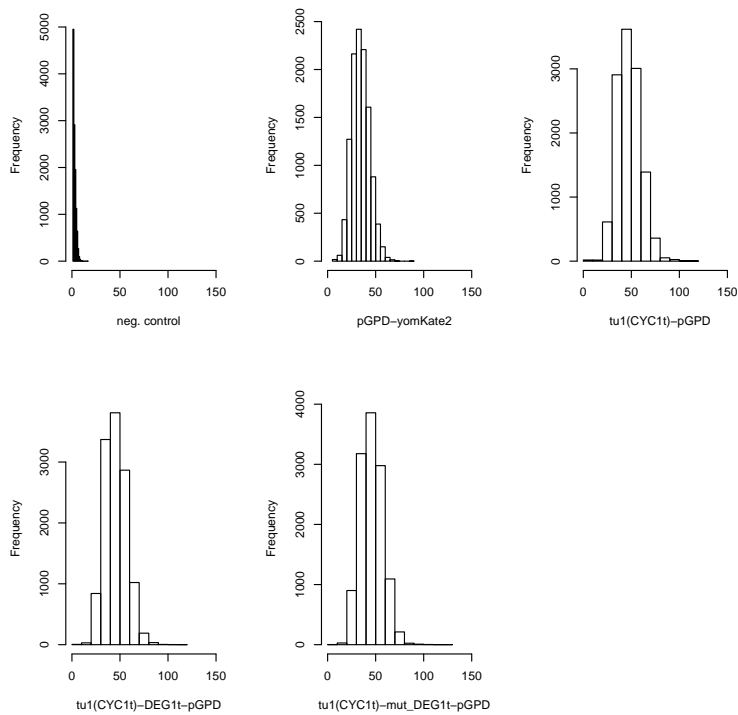

Figure S14: Red fluorescent protein expression by two-transcription-unit systems (see Figure S4 above). A) Box plots. Here, the contribution of yEGFP to the red fluorescence signal (about 14 AU) is not subtracted from the red fluorescence levels measured on the two-transcription-unit systems. B) Histograms.



A

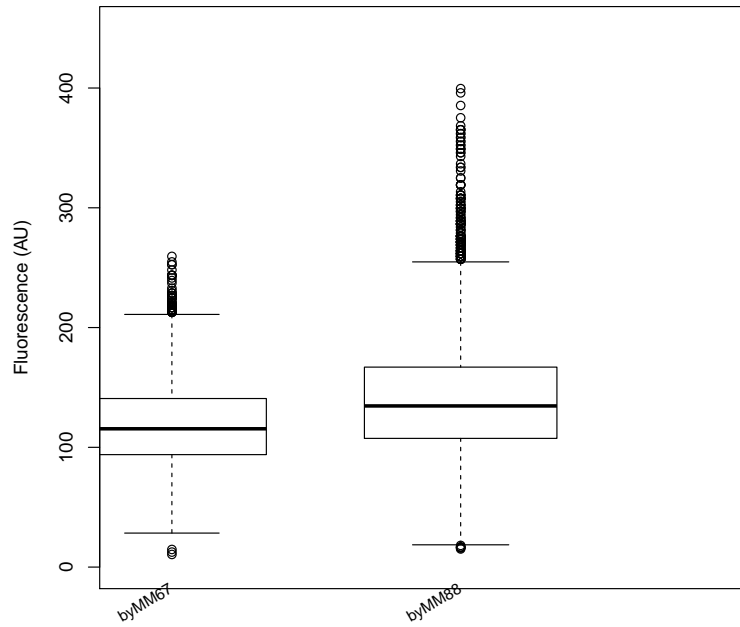

B

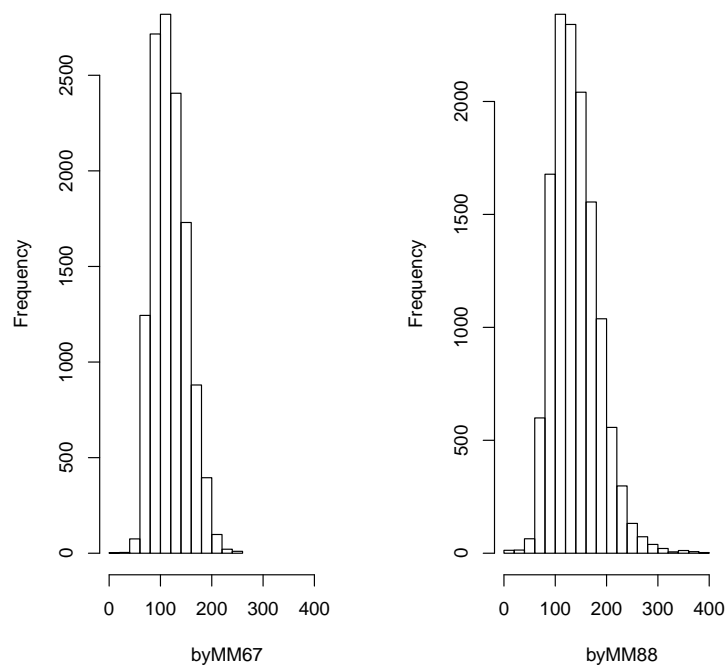

Figure S15: Comparison of fluorescence levels from plasmids assembled with different techniques (see Figure S5 above). A) Box plots. B) Histograms.

## DNA part sequences

### pGPD sequence

GAGCCCGCTTTTTAAGCTGGCATCCAGAAAAAAAAGAATCCCAGCACCAAAAT  
ATTGTTTTCTTCACCAACCATCAGTTCATAGGTCCATTCTCTTAGCGCAACTACA  
GAGAACAGGGGCACAAACAGGCCAAAAACGGGCACAACCTCAATGGAGTGAT  
GCAACCTGCCTGGAGTAAATGATGACACAAGGCAATTGACCCACGCATGTATCT  
ATCTCATTTTTCTTACACCTTCTATTACCTTCTGCTCTCTCTGATTTGGAAAAAGCT  
GAAAAAAAAGGTTGAAACCAGTTCCTGAAATTATTCCCCTACTTGACTAATAAG  
TATATAAAGACGGTAGGTATTGATTGTAATTCTGTAAATCTATTTCTTAACTTCTTA  
AATTCTACTTTTATAGTTAGTCTTTTTTTTTAGTTTTTAAAAACACCAAGAACTTAGTTTC  
GAATAAACACACATAAACAAAAAATGAGATAGATACATGCGTGGGTCAATT  
GCCTTGTGTCATCATTTACTCCAGGCAGGTTGCATCACTCCATTGAGGTTGTGCC  
CGTTTTTTGCTGTTTGTGCCCTGTTCTCTGTAGTTGCGCTAAGAGAATGGACC  
TATGAACTGATGGTTGGTGAAGAAAAACAATTTTTGGTGCTGGGATTCTTTTTTTTT  
CTGGATGCCAGCTTAAAAAGCGGGCTC

### mut\_pGPD sequence

CAGTTCGAGTTTATCATTATCAATACTGCCATTTCAAAGAATACGTAAATAATTAATAG  
TAGTGATTTTCTTAACCTTTATTTAGTCAAAAAATTAGCCTTTTAATTCTGCTGTAACCC  
GTACATGCCAAAATAGGGGGCGGGTTACACAGAATATATAACATCGTAAGGTTTGA  
CCGAGACAGTTTATTCCTGATTGGGGCTAAATATAATGGAGCCCGCTTTTTAAGCTG  
GCATCCAGAAAAAAAAGAATCCCAGCACCAAAATATTGTTTTCTTACCAACCATC  
AGTTCATAGGTCCATTCTCTTAGCGCAACTACAGAGAACAGGGGCACAAACAGGCA  
AAAAACGGGCACAACCTCAATGGAGTGATGCAACCTGCCTGGAGTAAATGATGACA  
CAAGGCAATTGACCCACGCATGTATCTATCTCATTTTTCTTACACCTTCTATTACCTTCT  
GCTCTCTCTGATTTGGAAAAAGCTGAAAAAAAAGGTTGAAACCAGTTCCTGAAATT  
ATTCCTACTTTGACTAATAAGTATATAAAGACGGTAGGTATTGATTGTAATTCTGTAAA  
TCTATTTCTTAACTTCTTAAATTCTACTTTTATAGTTAGTCTTTTTTTTTAGTTTTTAAACA  
CCAAGAACTTAGTTTTCGAATAAACACACATAAACAAACAA

### pTEF1 sequence

ATAGCTTCAAATGTTTCTACTCCTTTTTTTACTCTTCCAGATTTTCTCGGACTCCGCGCA  
TCGCCGTACCACTTCAAACACCCCAAGCACAGCATACTAAATTTCCCCTCTTTCTTCT  
CTAGGGTGTGTTAATTACCCGTACTAAAGGTTTGGAAAAGAAAAAGAGACCGCCTC  
GTTTCTTTTTCTTCGTCGAAAAAGGCAATAAAAATTTTTATCACGTTTCTTTTTCTTGAAA  
ATTTTTTTTTGATTTTTTTCTCTTTTCGATGACCTCCCATTTGATATTTAAGTTAATAAACGG  
TCTTCAATTTCTCAAGTTTCAGTTTCATTTTTCTTGTCTATTACAACTTTTTTTACTTCTT  
GCTCATTAGAAAGAAAGCATAGCAATCTAATCTAAGTTT

### pTEF2 sequence

GCTACCTATATTCACCATAACATCAATCATGCGGTTGCTGGTGTATTTACCAATAATGTTT  
AATGTATATATATATATATATATGGGGCCGTATACTTACATATAGTAGATGTCAAGCGTAGGC  
GCTTCCCCTGCCGGCTGTGAGGGCGCCATAACCAAGGTATCTATAGACCGCCAATCAG  
CAAACCTACCTCCGTACATTCATGTTGCACCCACACATTTATACACCCAGACCGCGACAAA  
TTACCCATAAGGTTGTTTGTGACGGCGTCTGACAAGAGAACGTGGGAACCTTTTTAGGCT  
CACCAAAAAAGAAAGAAAAAATACGAGTTGCTGACAGAAGCCTCAAGAAAAAAAATTT  
CTTCTTCGACTATGCTGGAGGCAGAGATGATCGAGCCGGTAGTTAACTATATATAGCTAA  
ATTGGTTCCATCACCTTCTTTTTCTGGTGTGCTCCTTCTAGTGCTATTTCTGGCTTTTTCC  
TATTTTTTTTTTTCCATTTTTCTTTCTCTTTCTAATATATAAATTCTCTTGCATTTTTCTATT

TTTCTCTCTATCTATTCTACTTGTTTATTCCCTTCAAGGTTTTTTTTTAAGGAGTACTTGTT  
TTTAGAATATACGGTCAACGAACATAATTAATACTAAAC

**pADH1 sequence**

GGGTGTACAATATGGACTTCCTCTTTTCTGGCAACCAAACCCATACATCGGGATTCT  
ATAATACCTTCGTTGGTCTCCCTAACATGTAGGTGGCGGAGGGGAGATATAACAATAGA  
ACAGATACCAGACAAGACATAATGGGCTAAACAAGACTACACCAATTACTGCCTCAT  
TGATGGTGGTACATAACGAACATAACTGTAGCCCTAGACTTGATAGCCATCATCATATC  
GAAGTTTCACTACCCTTTTTCCATTTGCCATCTATTGAAGTAATAATAGGCGCATGCAAC  
TTCTTTTCTTTTTTTTTCTTTTCTCTCTCCCCCGTTGTTGTCTCACCATATCCGCAATGAC  
AAAAAATGATGGAAGACACTAAAGGAAAAAATTAACGACAAAGACAGCACCAACAGAT  
GTCGTTGTTCCAGAGCTGATGAGGGGTATCTCGAAGCACACGAACTTTTTCTTCCT  
TCATTCACGCACACTACTCTCTAATGAGCAACGGTATACGGCCTTCCTCCAGTTACTTG  
AATTTGAAATAAAAAAAGTTTGTCTGCTTGTCTATCAAGTATAAATAGACCTGCAATTATTA  
ATCTTTTGTTCCTCGTCATTGTTCTCGTTCCCTTTCTTCCTTGTTTCTTTTTCTGCACAA  
TATTTCAAGCTATACCAAGCATACAATCAACTATCTCATATACA

**pACT1 sequence**

CTTCCTTATCGGATCCTCAAACCCTTAAAAACATATGCCTCACCCCTAACATATTTTCCAAT  
TAACCCTCAATATTTCTCTGTACCCCGGCCTCTATTTTCCATTTTCTTCTTTACCCGCCACG  
CGTTTTTTTCTTTCAAATTTTTTTCTTCCTTCTTCTTTTTTCTTCCACGTCTCTTGCATAAATA  
AATAAACCGTTTTGAAACCAAACCTCGCCTCTCTCTCTCTTTTTTGAATATTTTTGGGTTTGT  
TTGATCCTTTTCTTCCCAATCTCTCTTGTTTAATATATATTCATTTATATCACGCTCTTTTTTAT  
CTTCCTTTTTTTCTCTCTCTTGTATTCTTCTTCCCTTTCTACTCAAACCAAGAAGAAAA  
GAAAAGGTCAATCTTTGTTAAAGAATAGGATCTTCTACTACATCAGCTTTTAGATTTTTTACGC  
TACTGCTTTTTTCTTCCCAAGATCGAAAATTTACTGAATTAACA

**pCYC1min sequence**

GCATGCATGTGCTCTGTATGTATATAAACTCTTGTTTTCTTCTTTTTCTCTAAATATTCTTT  
CCTTATACATTAGGACCTTTGCAGCATAAATTACTATACTTCTATAGACACACAAACACAA  
ATACACACACTAAATTAATA

**pCYC1noTATA sequence**

TTCTTTCTTATACATTAGGACCTTTGCAGCATAAATTACTATACTTCTATAGACACA  
CAAACACAAATACACACACTAAATTAATA

**DEG1t sequence**

AATAATATATAAACCTGTATAATATAACCTTGAAGACTATATTTCTTTTC

**mut\_DEG1t sequence**

AATAAGAGATAAACCTGTATAATATAACCTTGAAGACTATATTTCTTTTC

**Tsynth8 sequence**

TATATAAACTCATTTACTTATGTAGGAATAAAGAGTATCATCTTTCAA

**mut\_Tsynth8 sequence**

GAGATAAACTCATTTACTTATGTAGGAATAAAGAGTATCATCTTTCAA

### **genCYC1t sequence**

ACAGGCCCTTTTCCTTTGTGCGATATCATGTAATTAGTTATGTCACGCTTACATTC  
ACGCCCTCCTCCCACATCCGCTCTAACCGAAAAGGAAGGAGTTAGACAACCTG  
AAGTCTAGGTCCCTATTTATTTTTTTTAAATAGTTATGTTAGTATTAAGAACGTTATTT  
ATATTTCAAATTTTCTTTTTTTTTCTGTACAAACGCGTGTACGCATGTAACATTATA

### **CYC1t sequence**

CATGTAATTAGTTATGTCACGCTTACATTCACGCCCTCCCCCACATCCGCTCTA  
ACCGAAAAGGAAGGAGTTAGACAACCTGAAGTCTAGGTCCCTATTTATTTTTTTA  
TAGTTATGTTAGTATTAAGAACGTTATTTATATTTCAAATTTTCTTTTTTTTTCTGTA  
CAGACGCGTGTACGCATGTAACATTATACTGAAAACCTTGCTTGAGAAGGTTTTG  
GGACGCTCGAAGGCTTTAATTTGCAAGCT

### **shortADH1t sequence**

CTAATAAGTTATAAAAAATAAGTGTATACAAATTTTAAAGTGA CTCTTAGGTTTTA  
AAACGAAAATTCTTATTCTTGAGTA ACTCTTCCTGTAGGTCAGGTTGCTTTCTCA  
GGTATAGCATGAGGTGCTCTTATTGACCACACCTCTACCGGCATG

### **s100 sequence**

GAATTATTTGATCACCAAGGTGCAGAGCCAGCCTTCTTATTTCGGCCTTGAATTGA  
TCATATGCGGATTAGAAAAACA ACTTAAATGTGAAAGTGGATCTT

### **yEGFP sequence**

ATGTCTAAAGGTGAAGAATTATTC ACTGGTGTGTGCCAATTTTGGTTGAATTAGA  
TGGTGATGTTAATGGTCACAAATTTTCTGTCTCCGGTGAAGGTGAAGGTGATGCT  
ACTTACGGTAAATGACCTTAAAATTTATTTGTACTACTGGTAAATTGCCAGTTCCA  
TGGCCAACCTTAGTCACTACTTTTCGGTTATGGTGTTC AATGTTTTGCGAGATACCC  
AGATCATATGAAACAACATGACTTTTTCAAGTCTGCCATGCCAGAAGGTTATGTTCA  
AGAAAGA ACTATTTTTTTCAAAGATGACGGTAACTACAAGACCAGAGCTGAAGTCA  
AGTTTGAAGGTGATACCTTAGTTAATAGAATCGAATTTAAAAGGTATTGATTTTTAAAGA  
AGATGGTAACATTTTAGGTCACAAATTGGAATACA ACTATAACTCTCACAATGTTTAC  
ATCATGGCTGACAAACAAAAGAATGGTATCAAAGTTAACTTCAA AATTAGACACAACA  
TTGAAGATGGTCTGTTC AATTAGCTGACCATTATCAACAAAATACTCCAATTGGTGA  
TGGTCCAGTCTTGT TACCAGACAACCATTACTTATCCACTCAATCTGCCTTATCCAAA  
GATCCAAACGAAAAGAGAGACCACATGGTCTTGT TAGAATTTGTTACTGCTGCTGGT  
ATTACCCATGGTATGGATGAATTGTACAAATAA

### **yEGFPgg sequence**

ATGTCTAAAGGTGAAGAATTATTC ACTGGTGTGTGCCAATTTTGGTTGAATTAGATG  
GTGATGTTAATGGTCACAAATTTTCTGTCTCCGGTGAAGGTGAAGGTGATGCTACTTA  
CGGTAAATTGACCTTAAAATTTATTTGTACTACTGGTAAATTGCCAGTTCCATGGCCAA  
CCTTAGTCACTACTTTTCGGTTATGGTGTTC AATGTTTTGCGAGATACCCAGATCATAT  
GAAACAACATGACTTTTTCAAGTCTGCCATGCCAGAAGGTTATGTTCAAGAAAGAAC  
TATTTTTTTCAAAGATGACGGTAACTACAAGACCAGAGCTGAAGTCAAGTTTGAAGG  
TGATACCTTAGTTAATAGAATCGAATTTAAAAGGTATTGATTTTTAAAGAAGATGGTAACA  
TTTTAGGTCACAAATTGGAATACA ACTATAACTCTCACAATGTTTACATCATGGCTGAC  
AAACAAAAGAATGGTATCAAAGTTAACTTCAA AATTAGACACAACATTGAAGATGGTTC  
TGTTCAATTAGCTGACCATTATCAACAAAATACTCCAATTGGT GATGGTCCAGTCTTGT  
TACCAGACAACCATTACTTATCCACTCAATCTGCCTTATCCAAAGATCCAAACGAAAAG

AGGGACCACATGGTCTTGTTAGAATTTGTTACTGCTGCTGGTATTACCCATGGTATGGA  
TGAATTGTACAAATAA

### yomKate2 sequence

ATGGTTTCTGAACTCATCAAGGAAAACATGCACATGAACTTTACATGGAAGGTACTGT  
GAACAATCATCATTTTAAGTGTACATCCGAGGGTGAAGGCAAACCTTACGAAGGAACTC  
AAACTATGAGAATTAAGCTGTAGAAGGTGGACCATTACCTTTTGCATTTGATATCTTGG  
CAACATCATTTCATGTATGGGAGCAAGACATTCATAAACCATACTCAAGGTATACCAGACTT  
TTTCAAACAGAGTTTTCCAGAGGGTTTTACATGGGAAAGAGTAACAACGTACGAGGATGG  
AGGTGTATTGACAGCCACTCAAGACACATCACTTCAAGATGGGTGTTAATCTACAATGT  
CAAGATTAGAGGCGTCAATTTCCCTTCTAATGGTCCAGTTATGCAGAAAAAGACATTAGG  
CTGGGAAGCGTCAACCGAAACCCTGTACCCTGCTGATGGTGGCCTAGAAGGCAGAGCT  
GACATGGCCCTTAAACTGGTTGGTGGAGGGCATCTAATCTGCAATTTGAAAACCACTTATC  
GTTCTAAAAAGCCAGCCAAAAACCTAAAGATGCCAGGTGTTTACTACGTCGACCGAAGATT  
AGAAAGGATTAAGAGGCTGATAAAGAGACTTATGTTGAACAACACGAAGTGGCAGTGGC  
TAGATACTGTGATTTGCCATCTAAGTTGGGACACAGATAA

## References

- [1] Marchisio MA: **In silico design and in vivo implementation of yeast gene Boolean gates.** *Journal of Biological Engineering* 2014, **8**:6.
- [2] Sherman F: **Getting Started with Yeast.** *Methods Enzymol.* 2002, **350**:3–41.
- [3] Marchisio MA, Colaiacovo M, Whitehead E, Stelling J: **Modular, rule-based modeling for the design of eukaryotic synthetic gene circuits.** *BMC Systems Biology* 2013, **7**:42.
- [4] Hoops S, Sahle S, Gauges R, Lee C, Pahle J, Simus N, Singhal M, Xu L, Mendes P, Kummer U: **COPASI—a COMplex PATHway SIMulator.** *Bioinformatics* 2006, **22**(24):3067–3074.
